# Supplementary material
Source: Springer Nature journal article supplement (https://www.springermedizin.de/resource/supplementary/12880_2014_236_MOESM4_ESM.pdf/9450304)

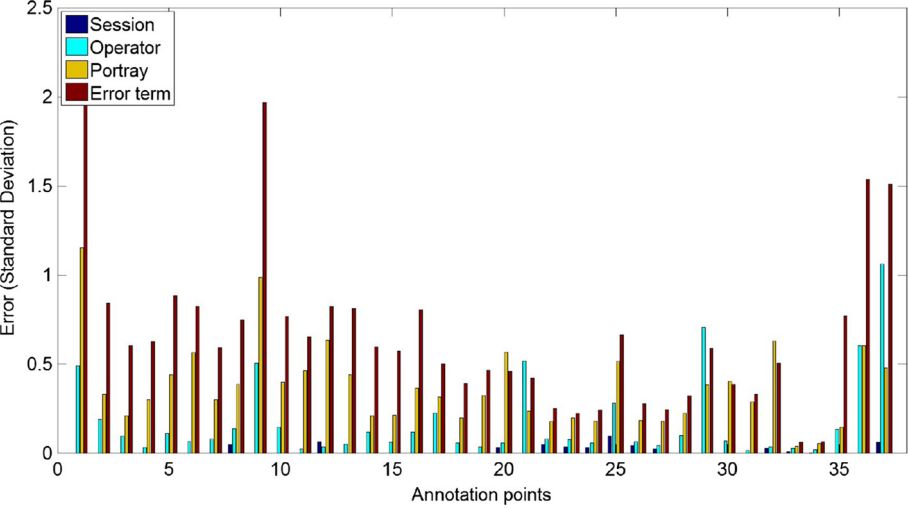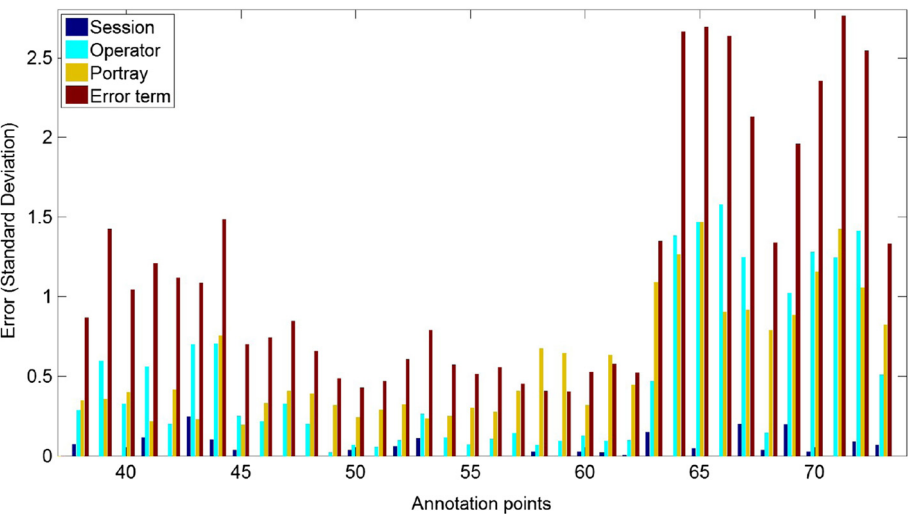

Supplement: MOESM4 [file 9450304]
